# Supplementary material
Source: PubMed Central journal article supplement (PMC3365746)
Supplement: supp_M112.345736_jbc.M112.345736-2.pdf [file supp_M112.345736_jbc.M112.345736-2.pdf]

# Figure S2

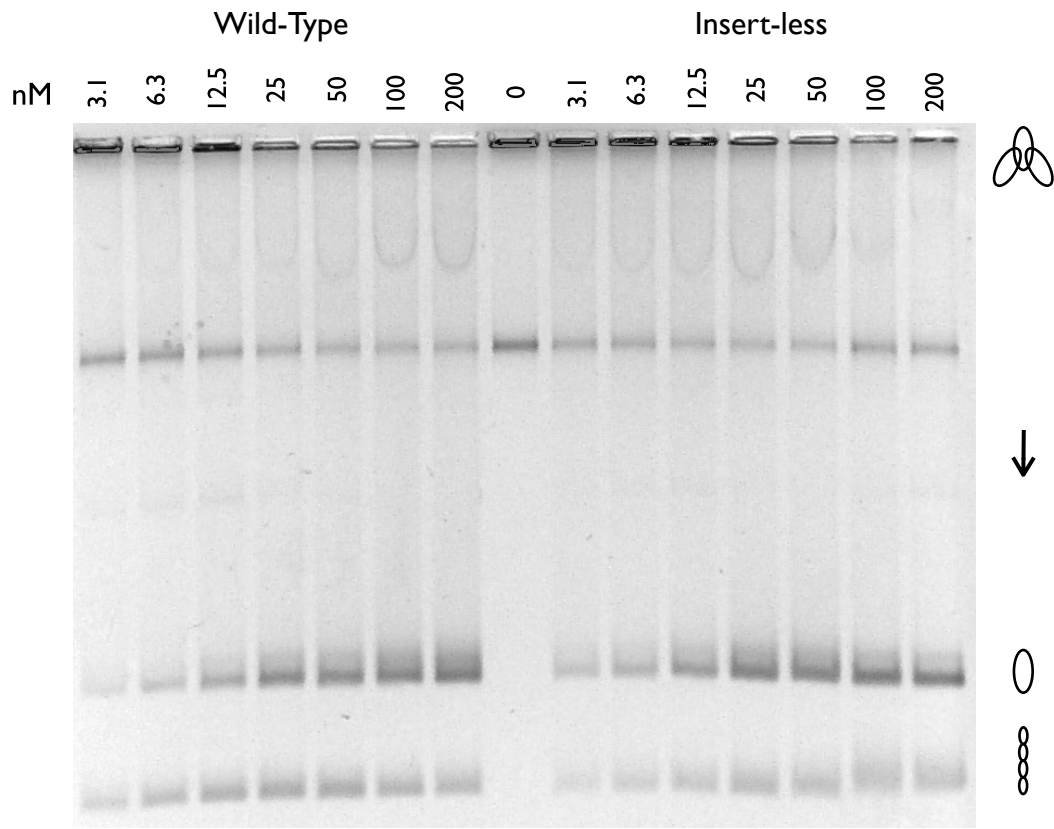

FIGURE S2. Wild-Type and Insert-less *E. coli* holoenzyme decatenation assay. The positions of the kinetoplast network, relaxed released circles, and supercoiled released circles are labeled with cartoon representations on the right.
