# Supplementary material
Source: PubMed Central journal article supplement (PMC3365746)

# Figure S1

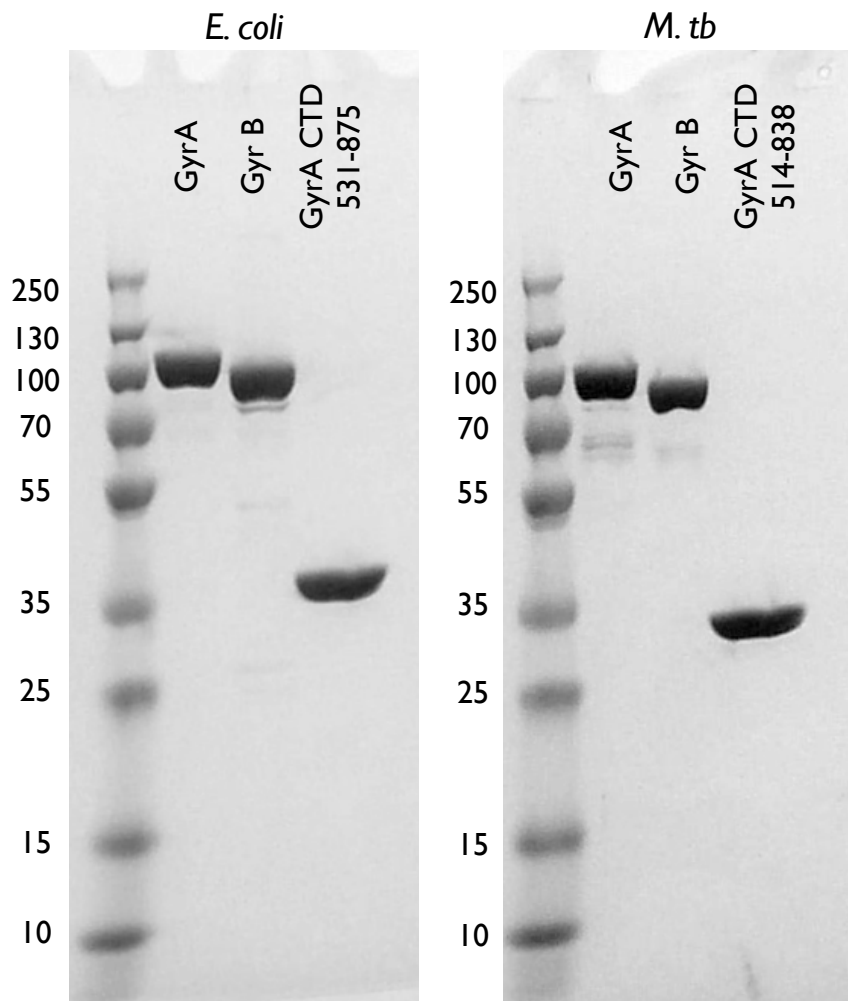

FIGURE S1. SDS-PAGE gels of purified *Mtb* and *E. coli* gyrase proteins.

Supplement: supp_M112.345736_jbc.M112.345736-1.pdf [file supp_M112.345736_jbc.M112.345736-1.pdf]
